# Supplementary material
Source: PubMed Central journal article supplement (PMC3073463)

### Supplemental Table 1

Analytical imprecision of the PON3 assay

| Control material | Intra-assay |          |       | Inter-assay |          |       |
|------------------|-------------|----------|-------|-------------|----------|-------|
|                  | Mean; mg/L  | SD; mg/L | CV; % | Mean; mg/L  | SD; mg/L | CV; % |
| Pool A           | 2.65        | 0.26     | 9.8   | 2.64        | 0.35     | 13.2  |
| Pool B           | 1.36        | 0.09     | 6.6   | 1.37        | 0.18     | 13.1  |
| Pool C           | 0.90        | 0.05     | 5.6   | 0.89        | 0.09     | 10.1  |

### Supplemental Table 2

Selected biochemical and demographical variables

| Variable                           | Value<br>( <i>n</i> = 356) |
|------------------------------------|----------------------------|
| Age, years                         | 47.4 (15.1)                |
| Female gender, %                   | 43.8                       |
| Body mass index, kg/m <sup>2</sup> | 27.2 (5.0)                 |
| Smokers, %                         | 33.7                       |
| Cholesterol, mmol/L                | 5.3 (0.9)                  |
| Triglycerides, mmol/L              | 1.27 (0.88)                |
| HDL-cholesterol, mmol/L            | 1.5 (0.4)                  |
| Apo A-I, g/L                       | 1.69 (0.28)                |
| PON1 lactonase, U/L                | 1.25 (0.73 – 2.01)         |
| PON1 paraoxonase, U/L              | 278.1 (161.19 – 580.4)     |
| PON1 concentration, mg/L           | 96.46 (43.57 – 291.09)     |
| PON3 concentration, mg/L           | 1.78 (1.00 – 2.47)         |

Quantitative variables are expressed as means (SD) or as medians (95% CI) as explained in Materials and Methods. Qualitative variables are expressed as % of the total participants.

### Supplemental Table 3

Correlation coefficients of the regression lines between serum PON3 concentration and other selected variables

| Variable                  | Correlation with PON3 ( <i>r</i> ) | <i>P</i> |
|---------------------------|------------------------------------|----------|
| Body mass index           | – 0.084                            | 0.140    |
| PON1 concentration        | 0.046                              | 0.385    |
| PON1 lactonase activity   | 0.057                              | 0.285    |
| PON1 paraoxonase activity | – 0.062                            | 0.243    |
| Cholesterol               | – 0.092                            | 0.082    |
| Triglycerides             | – 0.025                            | 0.641    |
| HDL cholesterol           | – 0.025                            | 0.880    |
| Apolipoprotein A-I        | – 0.009                            | 0.867    |

There were no significant relationships between PON3 and the other studied variables.

### Supplemental Table 4

Distribution of PON3 genotypes in the studied population

| Polymorphism          | dbSNP      | Seattle SNP | Genotype frequency ( <i>n</i> in parentheses) |            |            |          |
|-----------------------|------------|-------------|-----------------------------------------------|------------|------------|----------|
| PON3 <sub>.567</sub>  | rs11764079 | 5913        | CC/CT/TT                                      | 59.8 (213) | 36.2 (129) | 3.9 (14) |
| PON3 <sub>.665</sub>  | rs11770903 | 5815        | AA/AG/GG                                      | 59.8 (213) | 36.5 (130) | 3.7 (13) |
| PON3 <sub>.746</sub>  | rs17882539 | 5734        | CC/CT/TT                                      | 59.7 (212) | 36.5 (130) | 3.9 (14) |
| PON3 <sub>.4105</sub> | —          | 2375        | GG/GA/AA                                      | 61.7 (220) | 35.1 (125) | 3.0 (11) |
| PON3 <sub>.4970</sub> | —          | 1510        | TT/TG/GG                                      | 62.7 (223) | 34.8 (124) | 2.5 (9)  |
| PON3 <sub>.4984</sub> | —          | 1496        | AA/AG/GG                                      | 62.3 (222) | 34.8 (124) | 2.8 (10) |

## Supplemental Figure 1

Haplotype block assignment was performed using the 'Solid Spine of Linkage Disequilibrium (LD)' implemented in the Haploview software (Barrett JC et al. Bioinformatics 2005;21:263-5). This method searches for a 'spine' of strong LD running from one marker to another along the legs of the triangle in the LD chart. This means that the first and the last markers in a block are in strong LD with all intermediate markers but that the intermediate markers are not necessarily in LD with each other.

One single LD block was defined:

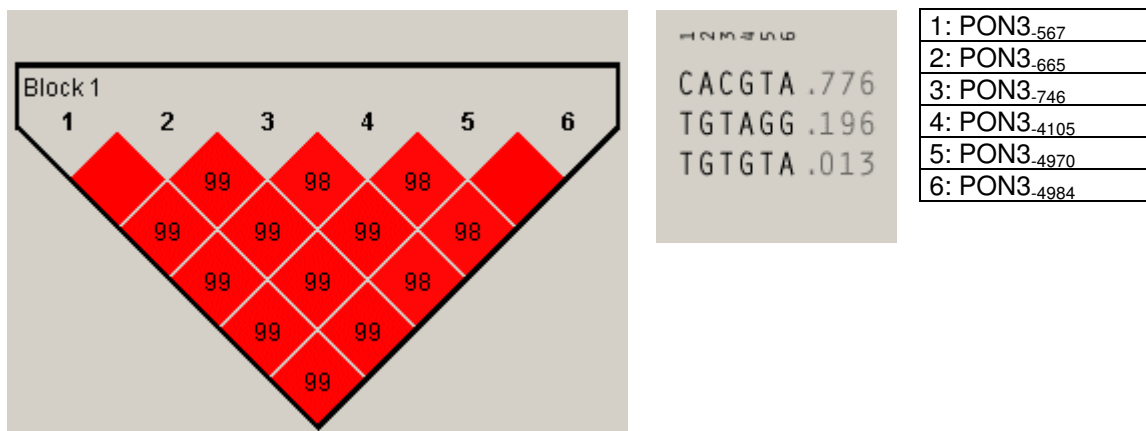

Supplement: supp_D014134_jlr.D014134-1.pdf [file supp_D014134_jlr.D014134-1.pdf]
